# Supplementary material for: Risk-stratified monitoring for sulfasalazine toxicity: prognostic model development and validation
Source: bioRxiv or medRxiv preprint supplement (doi:10.1101/2023.12.15.23299947), 2023-12-18

## Contents

|                                                                                                                                                                                                                      |    |
|----------------------------------------------------------------------------------------------------------------------------------------------------------------------------------------------------------------------|----|
| Figure S1: Study population selection criteria for model development.....                                                                                                                                            | 3  |
| Figure S2: Model validation cohort: Study population selection criteria .....                                                                                                                                        | 4  |
| Figure S3: Occurrence of cytopenia, myelotoxicity and renal function decline in sulfasalazine prescribed cohort.....                                                                                                 | 5  |
| Figure S4: Occurrence of cytopenia, myelotoxicity and renal function decline in sulfasalazine prescribed cohort excluding patients prescribed either methotrexate, leflunomide, or thiopurines at cohort entry ..... | 6  |
| Figure S5: Distribution of predicted risk in the model derivation cohort at 5 years.....                                                                                                                             | 7  |
| Figure S6: Calibration of a prognostic model for SSZ discontinuation with abnormal monitoring blood-test results at 5-years in the development cohort <sup>1</sup> .....                                             | 8  |
| .....                                                                                                                                                                                                                | 8  |
| Figure S7: Calibration of a prognostic model for SSZ discontinuation with abnormal monitoring blood-test results at 5-years in the validation cohort <sup>1</sup> .....                                              | 9  |
| Figure S8: Distribution of predicted risk in the model validation cohort at 5 years .....                                                                                                                            | 10 |
| Figure S9: Calibration of a prognostic model for SSZ discontinuation with abnormal monitoring blood-test results at 1 year in the validation cohort <sup>1</sup> .....                                               | 11 |
| Figure S10: Calibration of a prognostic model for SSZ discontinuation with abnormal monitoring blood-test results at 2 years in the validation cohort <sup>1</sup> .....                                             | 12 |
| Figure S11: Calibration of a prognostic model for SSZ discontinuation with abnormal monitoring blood-test results at 3 years in the validation cohort <sup>1</sup> .....                                             | 13 |
| Figure S12: Calibration of a prognostic model for SSZ discontinuation with abnormal monitoring blood-test results at 4 years in the validation cohort <sup>1</sup> .....                                             | 14 |
| Figure S13: Calibration of a prognostic model for SSZ discontinuation with abnormal monitoring blood-test results at 5 years in the validation cohort: stratified according to age. 15                               |    |
| Figure S14: Calibration of a prognostic model for SSZ discontinuation with abnormal monitoring blood-test results at 5 years in the validation cohort: stratified according to disease type.....                     | 16 |

Supplementary Table 1: Individual patient's characteristics at the midpoint of each decile of risk.

| Decile | Age± (yr.) | Sex | BMI (kg/m <sup>2</sup> ) | Alcohol     | Disease | DM  | CKD | Immune-suppress. drug | Statin | Anti-epileptic | Paracetamol | BTA | Cumulative probability of outcome (%) |
|--------|------------|-----|--------------------------|-------------|---------|-----|-----|-----------------------|--------|----------------|-------------|-----|---------------------------------------|
| 1      | 25-30      | F   | 35.2                     | Moderate    | PSA     | No  | No  | MTX                   | No     | No             | No          | No  | 5.25                                  |
| 2      | 35-40      | M   | 23.0                     | Non-drinker | RA      | No  | No  | No                    | No     | No             | No          | No  | 6.19                                  |
| 3      | 25-30      | F   | 21.6                     | Low         | PSA     | No  | No  | No                    | No     | No             | No          | No  | 6.72                                  |
| 4      | 55-60      | F   | 29.8                     | Low         | RA      | No  | No  | No                    | No     | No             | No          | No  | 7.25                                  |
| 5      | 55-60      | M   | 24.0                     | Non-drinker | RA      | No  | No  | No                    | No     | No             | Yes         | No  | 7.80                                  |
| 6      | 70-75      | F   | 27.9                     | Low         | RA      | No  | No  | Aza/6-MP              | No     | Yes            | Yes         | No  | 8.45                                  |
| 7      | 45-50      | F   | 25.3                     | Low         | RA      | No  | No  | MTX                   | No     | No             | No          | No  | 9.29                                  |
| 8      | 75-80      | M   | 27.7                     | Non-drinker | RA      | Yes | No  | No                    | Yes    | No             | Yes         | No  | 10.52                                 |
| 9      | 65-70      | M   | 30.6                     | Low         | PSA     | No  | Yes | No                    | No     | No             | Yes         | No  | 13.90                                 |
| 10     | 55-60      | F   | 33.8                     | Non-drinker | RA      | No  | No  | MTX                   | No     | No             | No          | Yes | 19.04                                 |

Aza/6-MP: - Azathioprine/6-Mercaptopurine; BMI: - Body Mass Index; BTA: - Blood Test abnormalities within 6 months of first primary care sulfasalazine prescription; CKD: - Chronic Kidney Disease; Anti-epileptics: - carbamazepine / valproate; DM: - diabetes mellitus; F: - female; M: - male; MTX: - methotrexate; PsA: - psoriatic arthritis; RA: - Rheumatoid Arthritis. ± 5-year age band. Exact age not shown for anonymity.

Figure S1: Study population selection criteria for model development

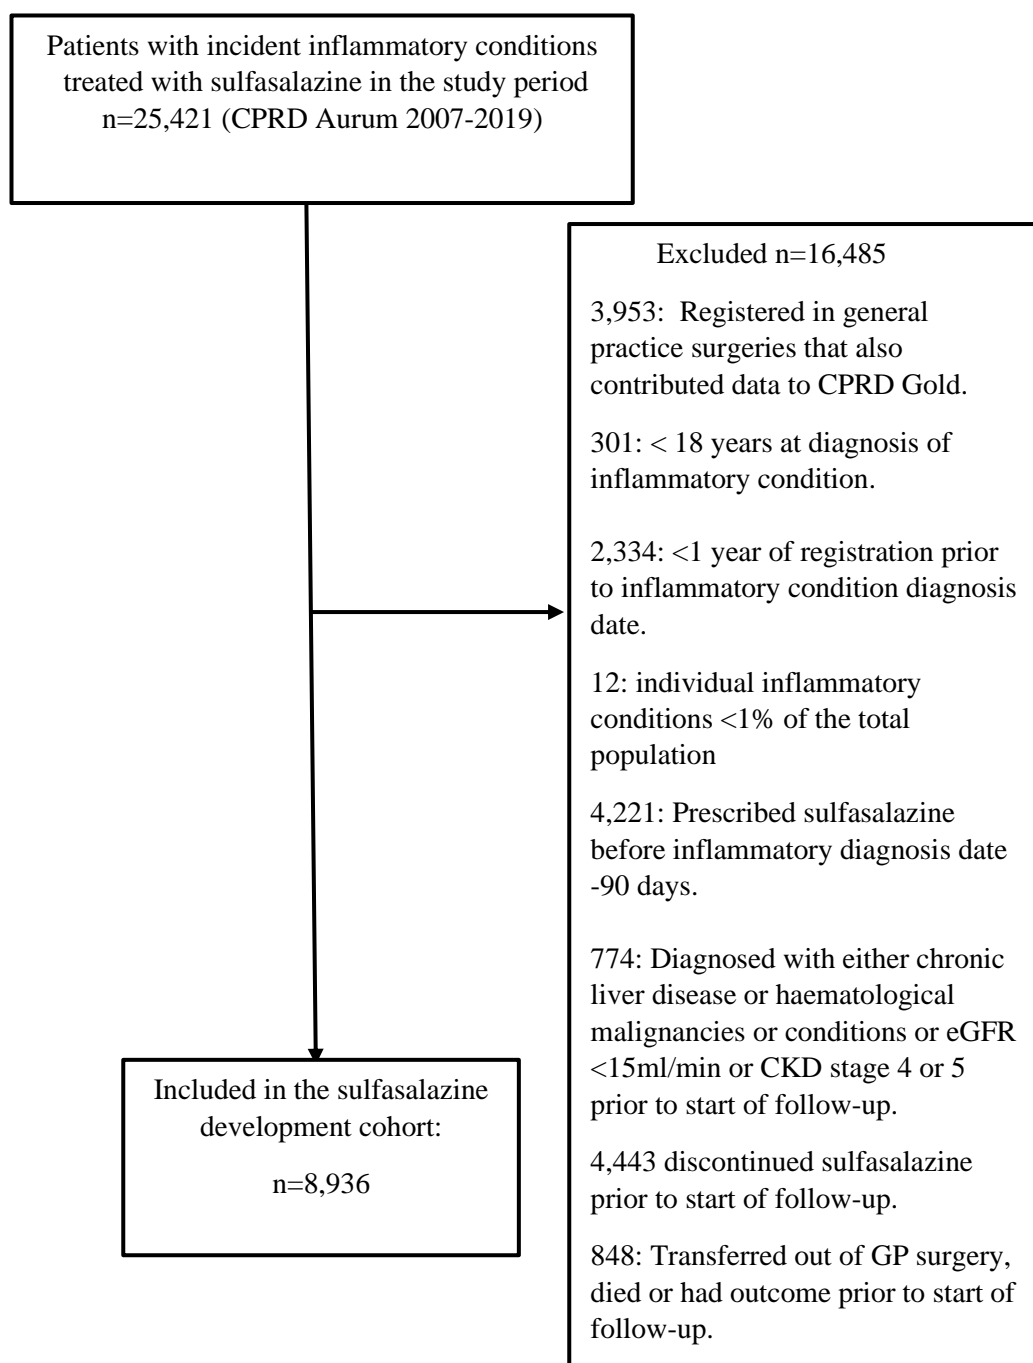

Figure S2: Model validation cohort: Study population selection criteria

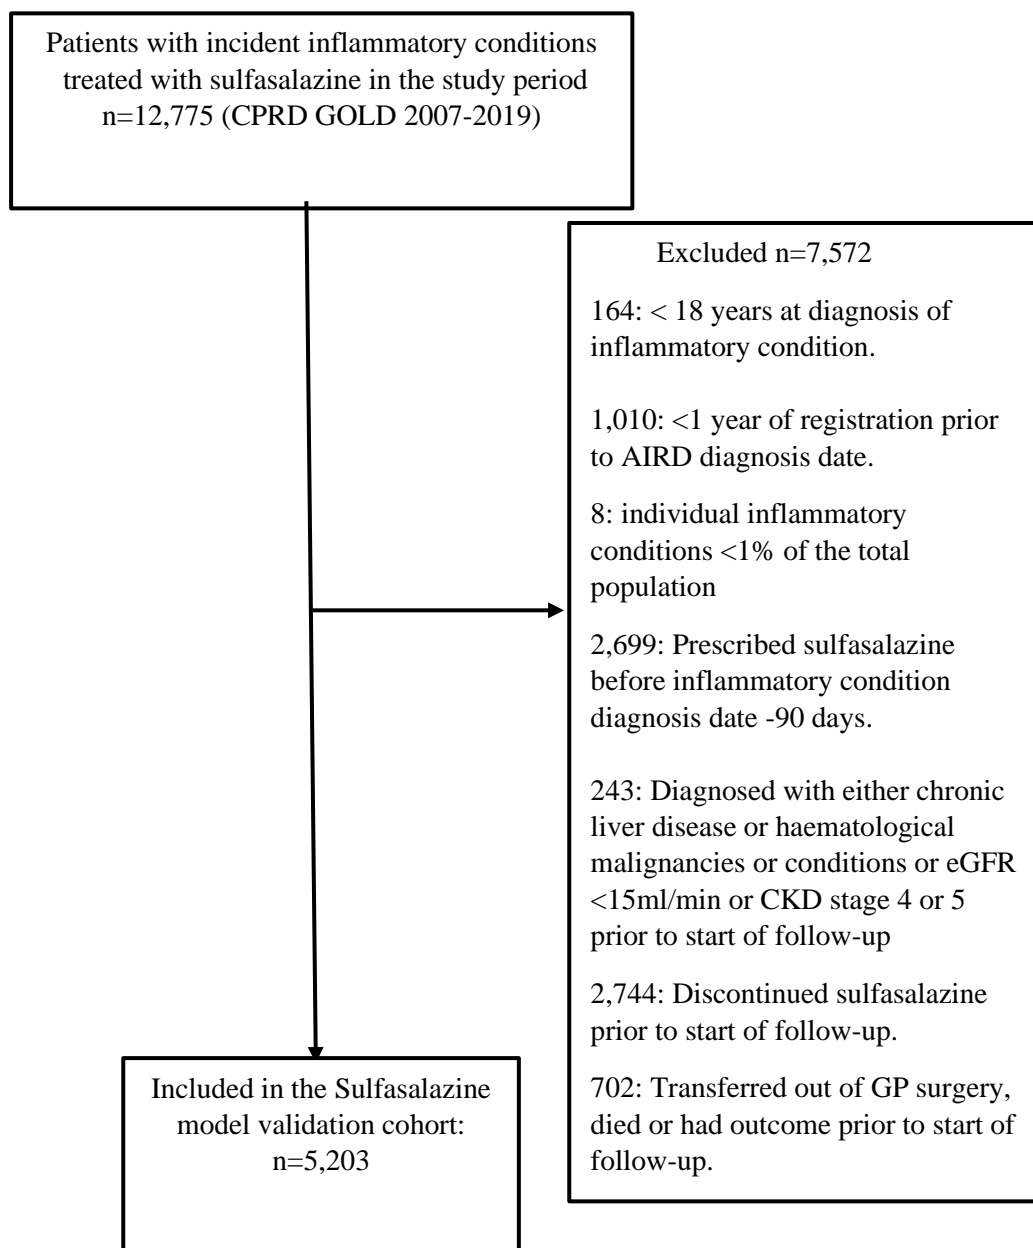

Figure S3: Occurrence of cytopenia, myelotoxicity and renal function decline in the cohort exposed to sulfasalazine

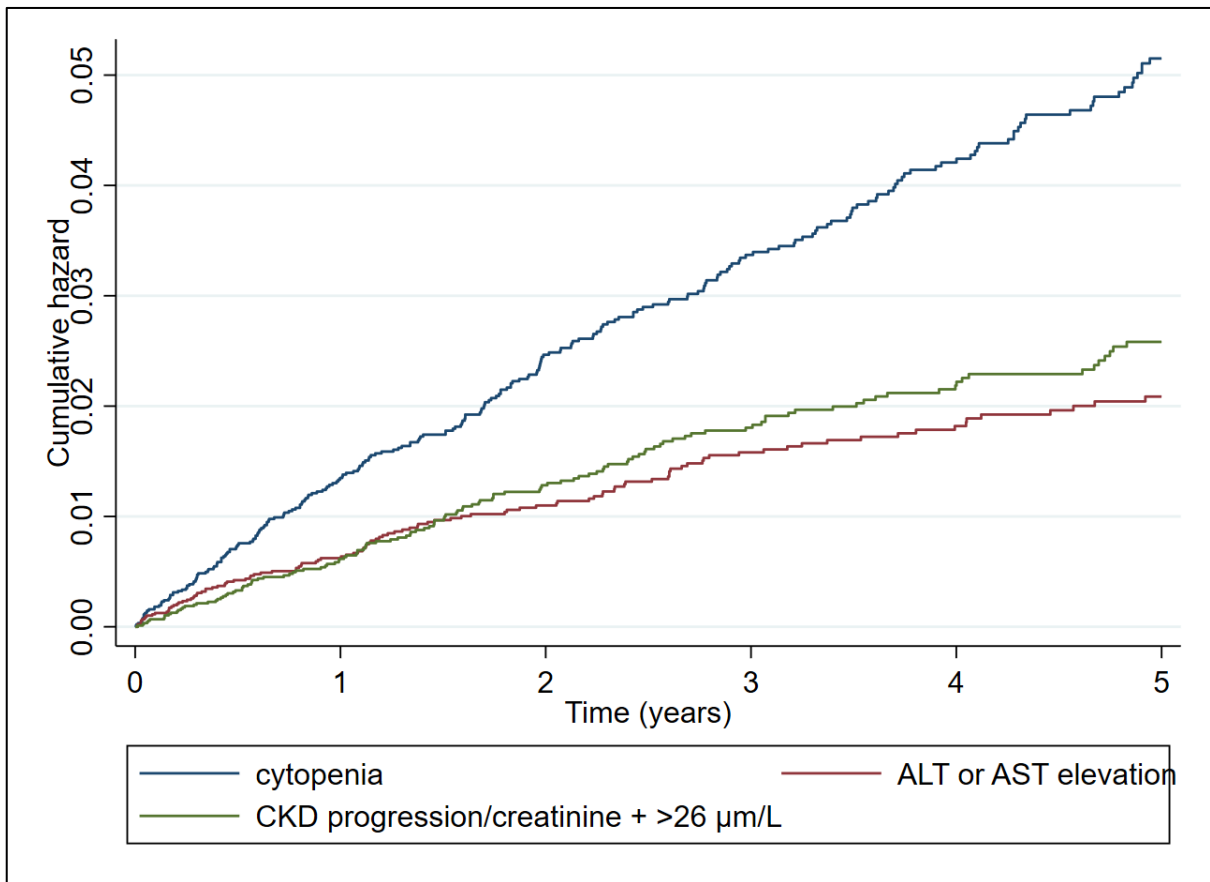

Figure S4: Occurrence of cytopenia, myelotoxicity and renal function decline in sulfasalazine prescribed cohort excluding patients prescribed either methotrexate, leflunomide, or thiopurines at cohort entry

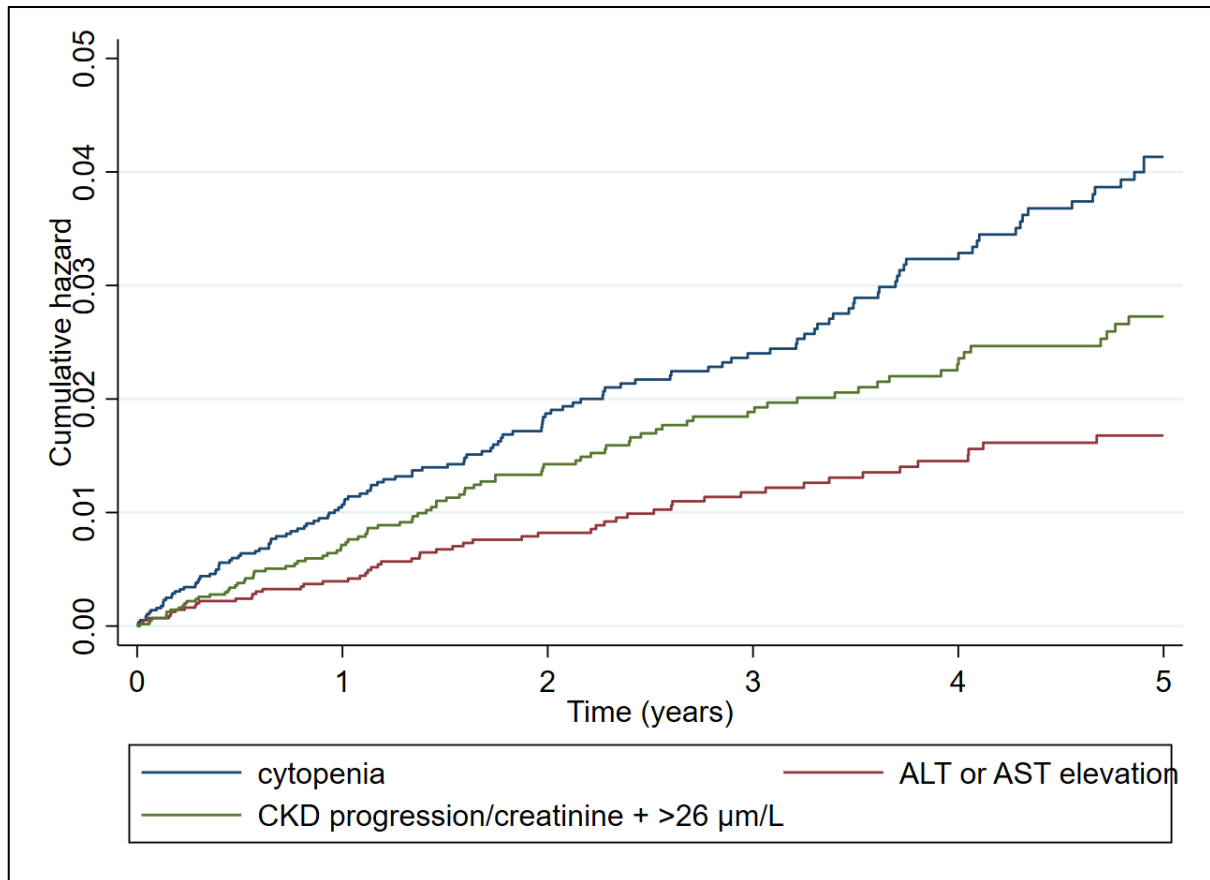

Figure S5: Distribution of predicted risk in the model derivation cohort at 5 years

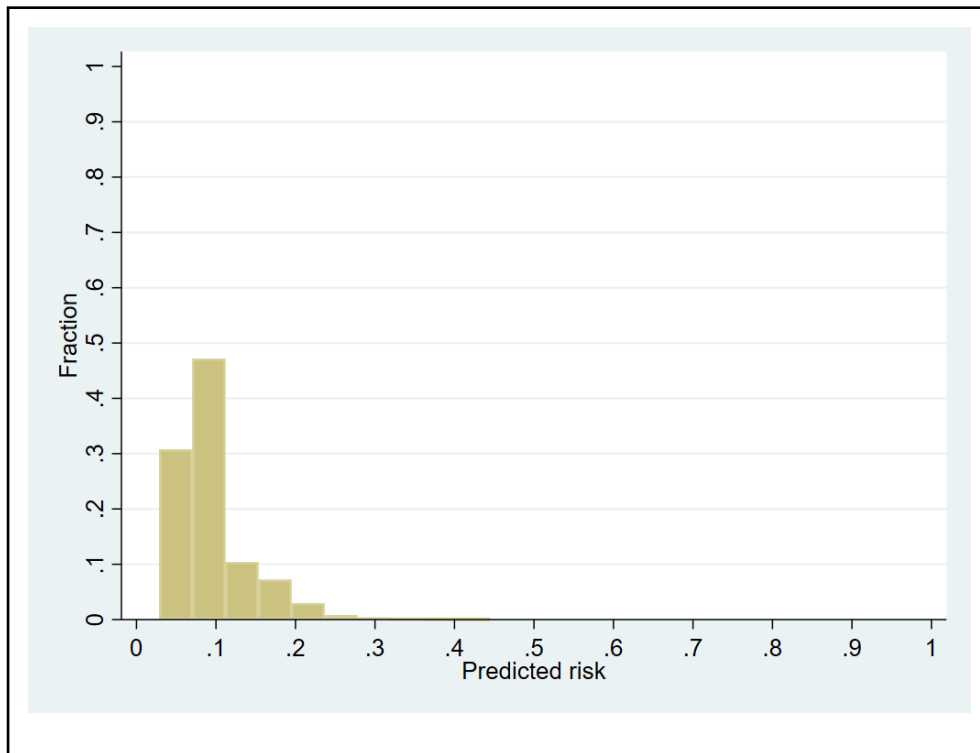

Figure S6: Calibration of a prognostic model for SSZ discontinuation with abnormal monitoring blood-test results at 5-years in the development cohort<sup>1</sup>

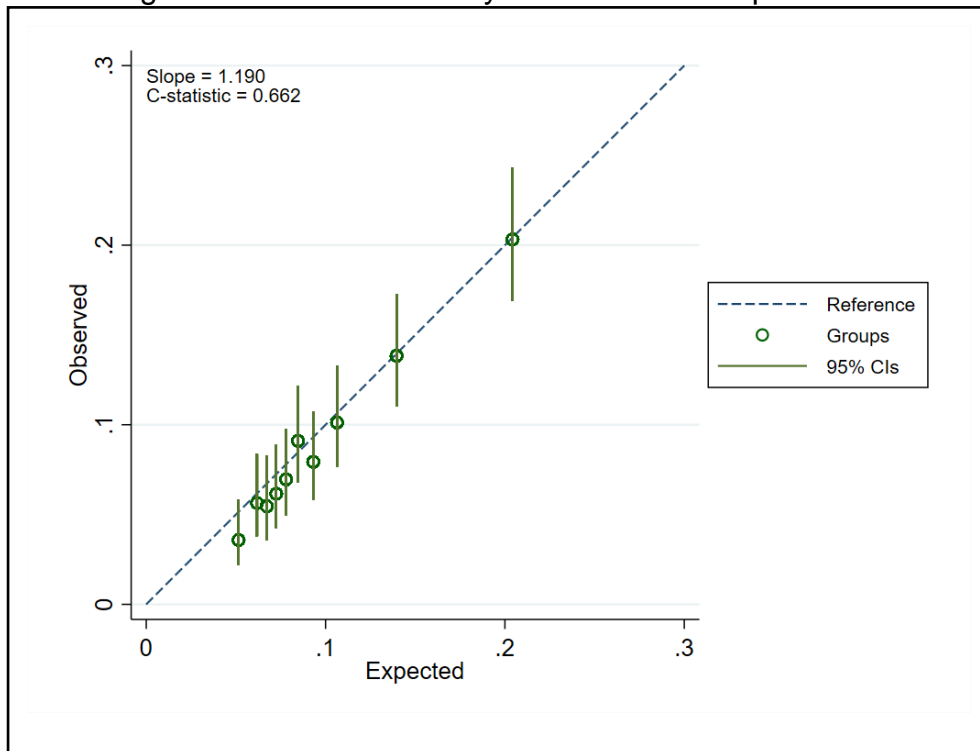

<sup>1</sup>Data from a single imputed dataset; So(t=5) 0.940



Figure S7: Calibration of a prognostic model for SSZ discontinuation with abnormal monitoring blood-test results at 5-years in the validation cohort<sup>1</sup>

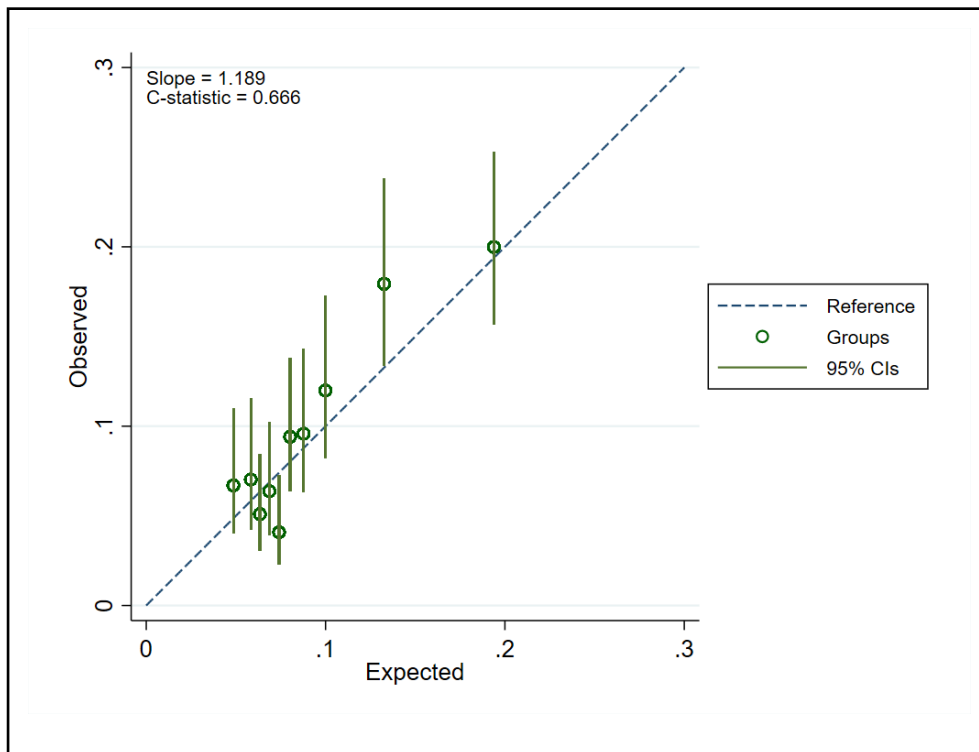

<sup>1</sup>Data from a single imputed dataset; So(t=5) 0.940

Figure S8: Distribution of predicted risk in the model validation cohort at 5 years

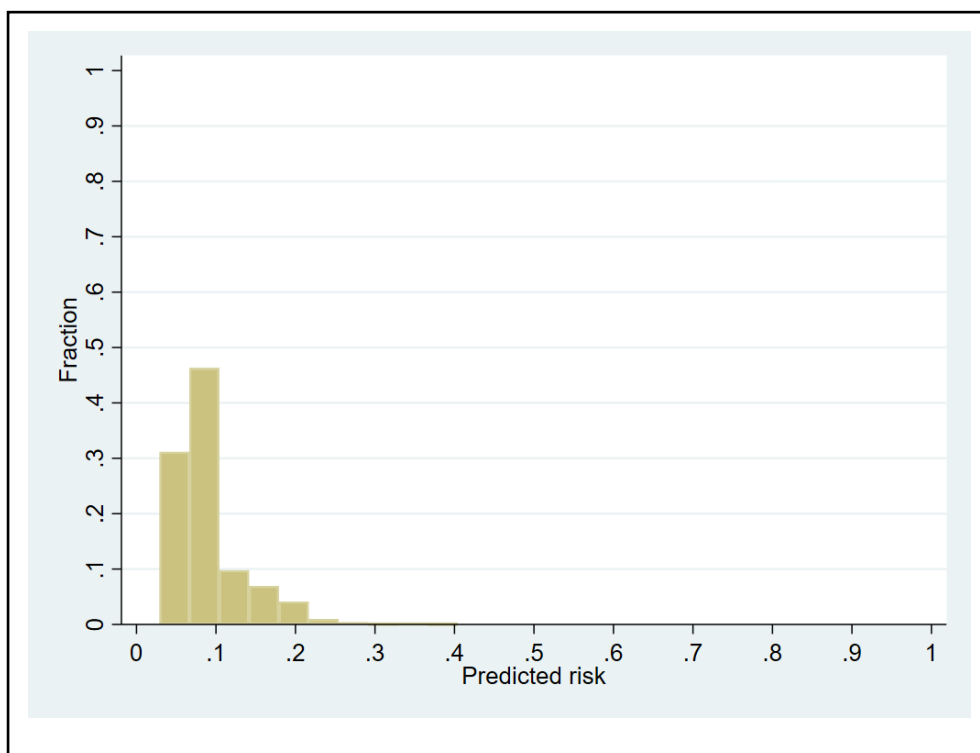

Figure S9: Calibration of a prognostic model for SSZ discontinuation with abnormal monitoring blood-test results at 1 year in the validation cohort<sup>1</sup>

A: Calibration plot

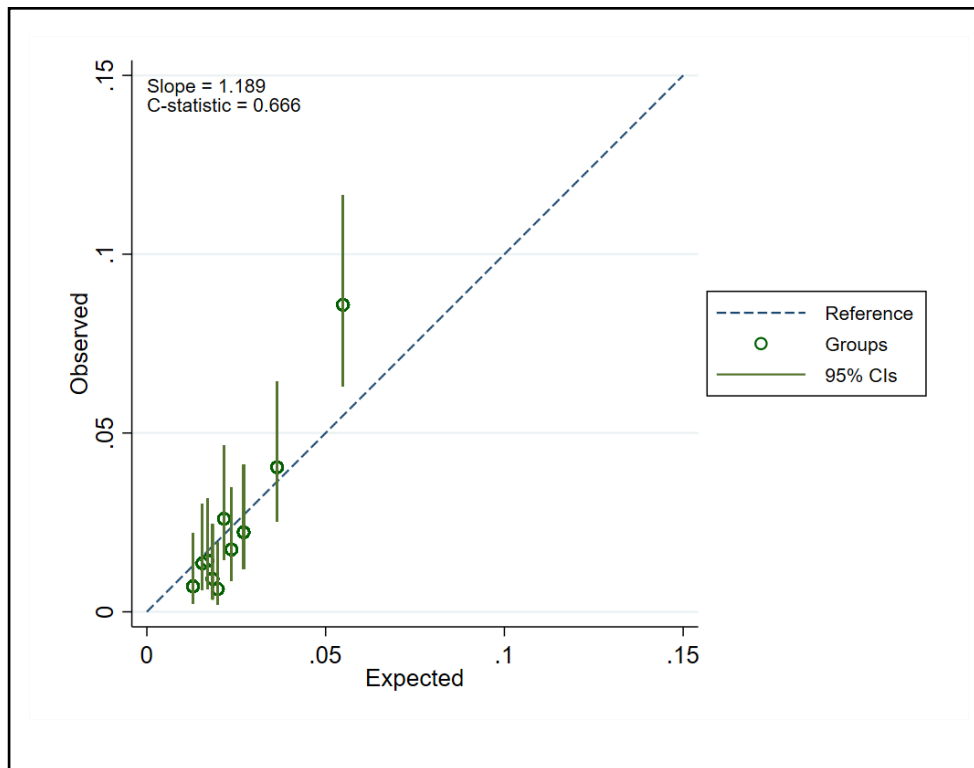

B: Smoothed calibration curve

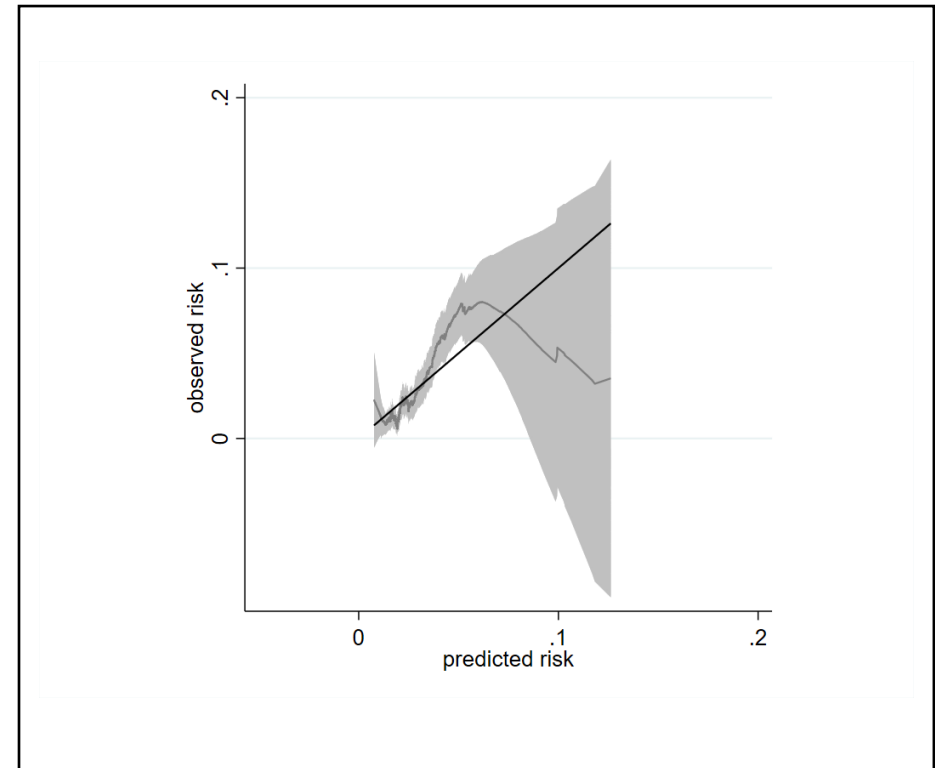

<sup>1</sup>Data from a single imputed dataset was used;  $S_o(t=1)$  0.984

Figure S10: Calibration of a prognostic model for SSZ discontinuation with abnormal monitoring blood-test results at 2 years in the validation cohort<sup>1</sup>

A. Calibration plot

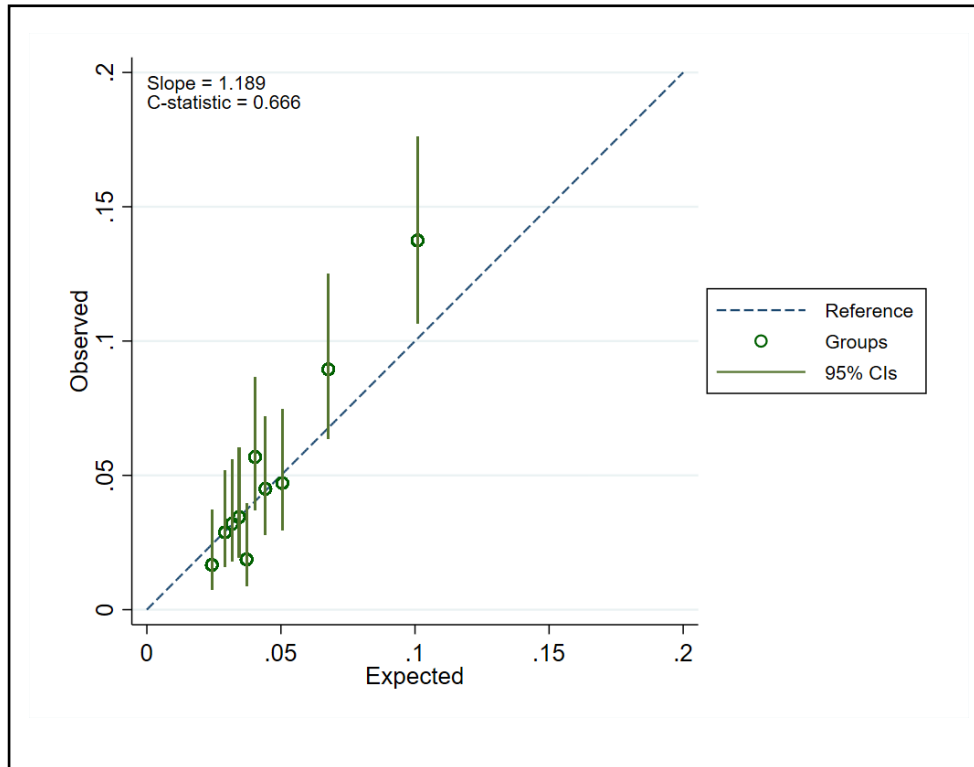

B. Smoothed calibration curve

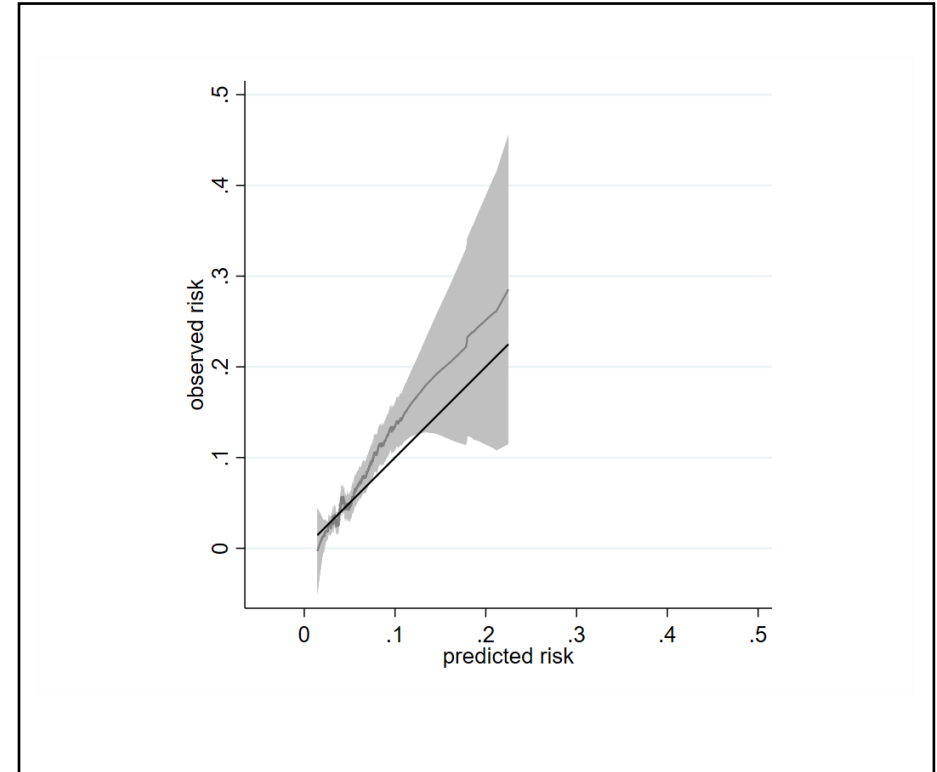

<sup>1</sup>Data from a single imputed dataset was used;  $S_o(t=2)$  0.970

Figure S11: Calibration of a prognostic model for SSZ discontinuation with abnormal monitoring blood-test results at 3 years in the validation cohort<sup>1</sup>

A. Calibration plot

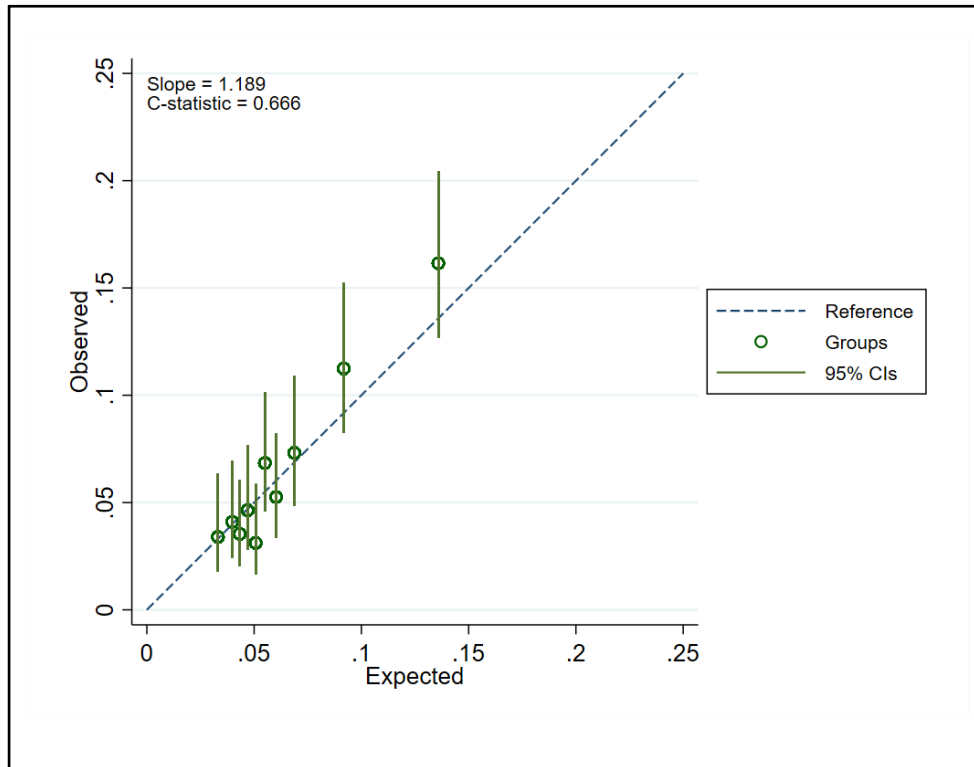

B. Smoothed calibration curve

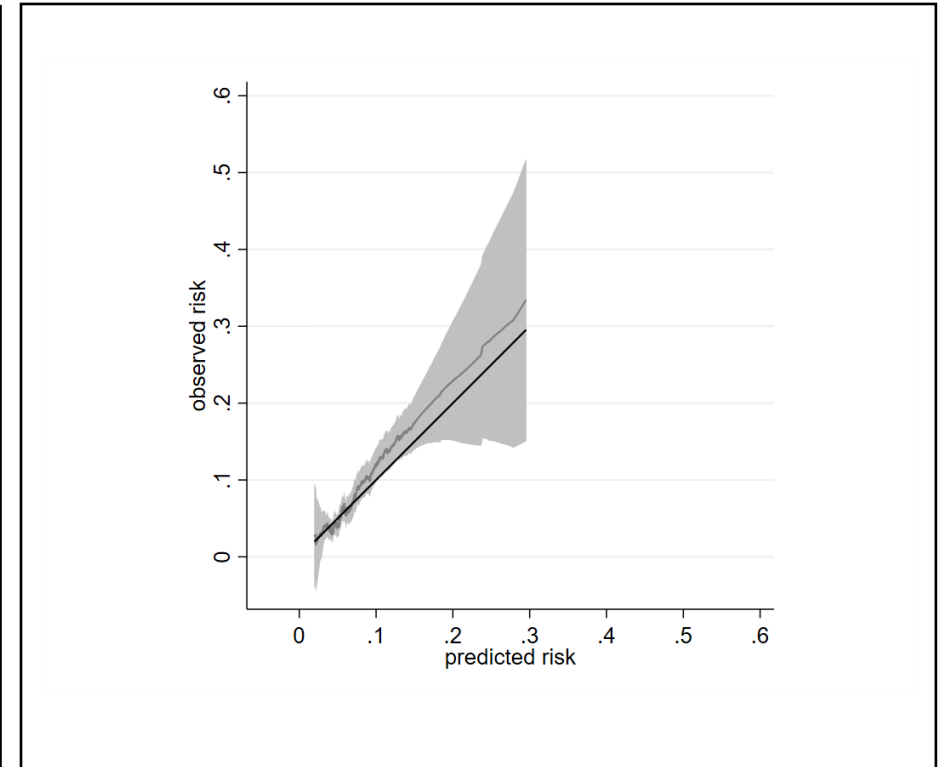

Data from a single imputed dataset was used;  $S_0(t=3)$  0.959

Figure S12: Calibration of a prognostic model for SSZ discontinuation with abnormal monitoring blood-test results at 4 years in the validation cohort<sup>1</sup>

A. Calibration plot

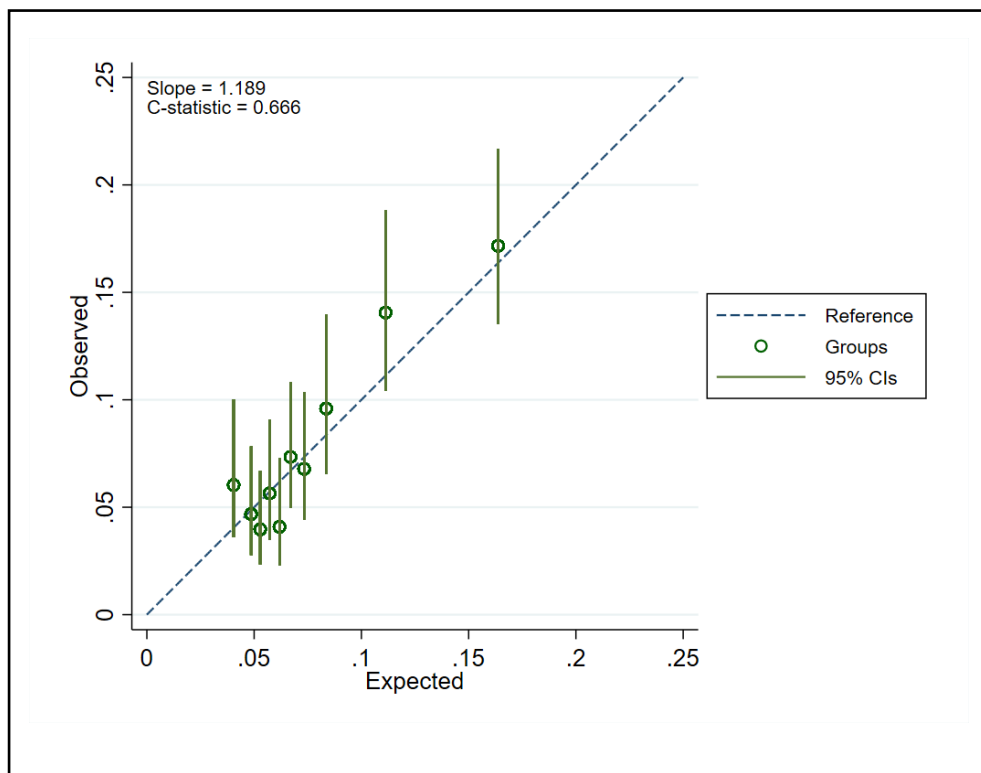

B. Smoothed calibration curve

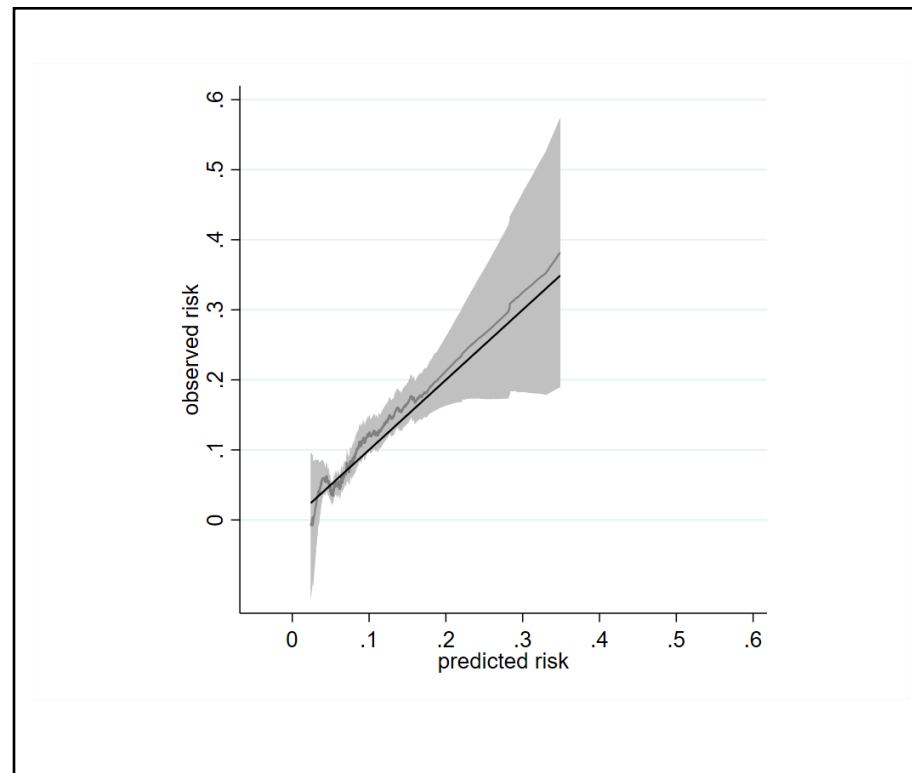

Data from a single imputed dataset was used;  $S_o(t=4)$  0.950

Figure S13: Calibration of a prognostic model for SSZ discontinuation with abnormal monitoring blood-test results at 5 years in the validation cohort: stratified according to age.

A. <60 years

B.  $\geq 60$  years

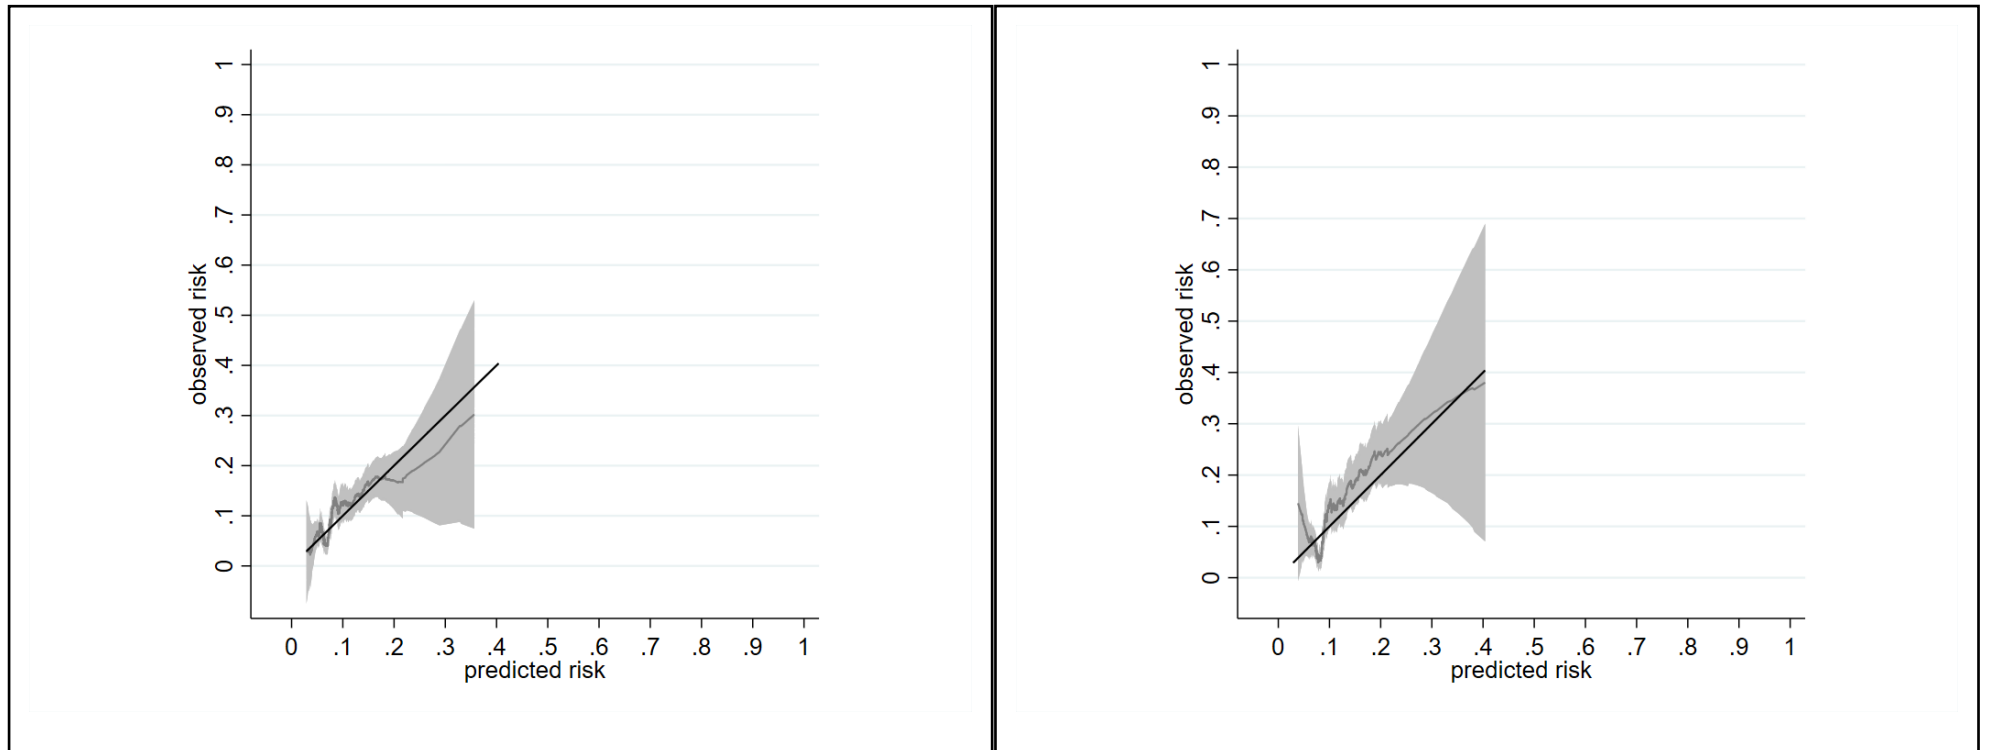

Figure S14: Calibration of a prognostic model for SSZ discontinuation with abnormal monitoring blood-test results at 5 years in the validation cohort: stratified according to disease type.

A: Rheumatoid Arthritis

B: other inflammatory conditions

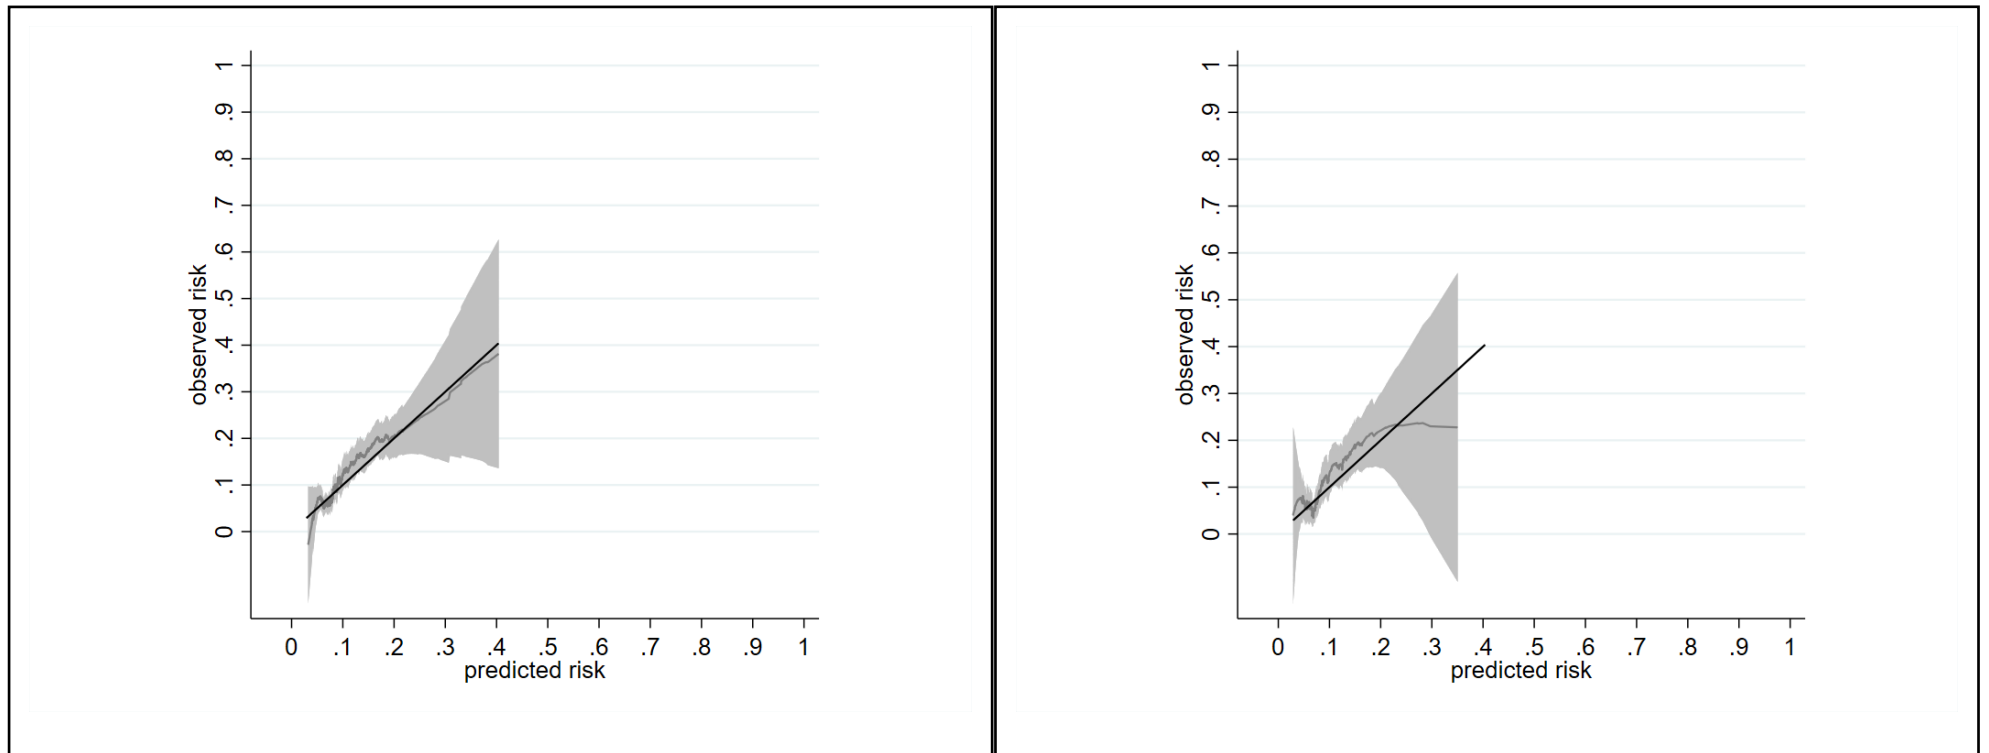

Supplement: Supplementary file [file media-1.pdf]
